# Supplementary material
Source: PubMed Central journal article supplement (PMC5582678)
Supplement: CPH723352_Appendix_1.pdf [file CPH723352_Appendix_1.pdf]

## Appendix 1:

A summary of prescribing for ambulatory ailments continuing education resources available to Canadian pharmacists by province (excluding provinces and territories in which prescribing legislation is absent).<sup>2,9,11,15,18,20-24,26-31</sup>

| Province     | Continuing Education Resource                                                                                                                                                                                                                                                                                                                                                                                                                                                                                                                                                                                                                | Required for certification | Format                                                              | Cost (\$)                                                                | Hours                                                                                                                |
|--------------|----------------------------------------------------------------------------------------------------------------------------------------------------------------------------------------------------------------------------------------------------------------------------------------------------------------------------------------------------------------------------------------------------------------------------------------------------------------------------------------------------------------------------------------------------------------------------------------------------------------------------------------------|----------------------------|---------------------------------------------------------------------|--------------------------------------------------------------------------|----------------------------------------------------------------------------------------------------------------------|
| <b>AB</b>    | Preparing to Apply for Additional Prescribing Authorization Course<br>Individual Employer-offered APA preparation courses                                                                                                                                                                                                                                                                                                                                                                                                                                                                                                                    |                            | In-person/workshop<br>Unknown                                       | 500.00 <sup>d</sup>                                                      | 5.0 <sup>a</sup>                                                                                                     |
| <b>SK</b>    | Level 1 Basics (information about prescriptive authority for Pharmacists)<br>Prescriptive Authority for Pharmacists –Minor ailments Part 1<br>Prescriptive Authority for Pharmacists – Minor Ailments Part 2 (diaper dermatitis, oral thrush and canker sores)<br>Prescriptive Authority for Pharmacists – Minor Ailments Part 3 (atopic dermatitis, hemorrhoids, dyspepsia and GERD, dysmenorrhea, headache including migraine, musculoskeletal strains and sprains, superficial bacterial infections, tinea corporis infections, tinea cruris skin infections and tinea pedis infections)<br>MedSask prescribing guidelines and algorithms | √<br>√                     | Online/ In-person<br>Online/In-person<br>Online<br>Online<br>Online | 131.25 <sup>a</sup><br>210.00 <sup>a</sup><br>105.00<br>183.75<br>Online | 5.0 <sup>a</sup><br>6.0 <sup>a</sup><br>2.5 <sup>a</sup><br>5.0 <sup>a</sup>                                         |
| <b>MB</b>    | Self-limiting conditions independent study program<br>Assessment and Prescribing for Ambulatory Ailments Workshop                                                                                                                                                                                                                                                                                                                                                                                                                                                                                                                            | √<br>√                     | Online<br>In-person                                                 | 50.00<br>450.00 <sup>f</sup>                                             | 15.0 <sup>a</sup><br>6.5 <sup>a</sup>                                                                                |
| <b>QC</b>    | Une formation sur les nouvelles activités de la Loi 41.                                                                                                                                                                                                                                                                                                                                                                                                                                                                                                                                                                                      | √                          | Online                                                              | 157.52                                                                   | 5.0 <sup>a</sup>                                                                                                     |
| <b>NB</b>    | Minor Ailments Orientation<br><br>NB Pharmacists Association Conference Panel Discussions                                                                                                                                                                                                                                                                                                                                                                                                                                                                                                                                                    | √                          | In-person/written document/ video<br><br>Panel discussion           | Online                                                                   | 2.0                                                                                                                  |
| <b>NS</b>    | Prescribing for Minor Ailments - Mini Modules:<br>Documentation for Pharmacists<br>General Patient Assessment<br>Eczema, Dermatitis and Urticaria<br>GERD, Threadworms and Pinworms<br>Musculoskeletal Disorders<br>Acne, Warts and Dandruff                                                                                                                                                                                                                                                                                                                                                                                                 |                            | Online<br>Online<br>Online<br>Online<br>Online<br>Online            | 39.00<br>39.00<br>39.00<br>39.00<br>39.00<br>39.00                       | 1.0 <sup>a</sup><br>1.0 <sup>a</sup><br>1.0 <sup>a</sup><br>1.0 <sup>a</sup><br>1.0 <sup>a</sup><br>1.0 <sup>a</sup> |
| <b>PEI</b>   | Prescribing for Minor Ailments in the Maritimes <sup>b</sup><br>Prescribing for Minor Ailments in PEI <sup>b</sup><br>Understanding new legislation in PEI                                                                                                                                                                                                                                                                                                                                                                                                                                                                                   | √<br>√                     | Online/ In-person<br>Webinar<br>Webinar                             | 450.00<br>75.00<br>75.00                                                 | 18.0 <sup>a</sup><br>2.5 <sup>a</sup><br>1.5 <sup>a</sup>                                                            |
| <b>NL</b>    | An Orientation to Prescribing by Pharmacists in NL<br>An Approach to Patient Assessment for Minor Ailments<br>Pharmacists Association of NL conference presentations                                                                                                                                                                                                                                                                                                                                                                                                                                                                         | √                          | Online<br>In-person<br>In-Person                                    | 50.00<br>0.00                                                            | 1.5 <sup>a</sup><br>1.0 <sup>a</sup>                                                                                 |
| <b>Other</b> | Assessing and Prescribing for Minor Ailments (CPhA)<br>Minor Ailments Therapeutic Modules <sup>c</sup>                                                                                                                                                                                                                                                                                                                                                                                                                                                                                                                                       |                            | Online<br>Online                                                    | 1250.00 <sup>g</sup>                                                     | 35.25 <sup>a</sup><br>4.0 <sup>a</sup>                                                                               |

a. Accredited provincially or by the Canadian Council on Continuing Education in Pharmacy.

b. Either course is accepted to attain certification to prescribe in PEI.

c. Program available to Shoppers Drug Mart pharmacists.

d. Cost is \$300 for members of the Alberta Pharmacists' Association.

e. Cost listed is for online program.

f. Cost was \$225 for members of the Manitoba Society of Pharmacists (now known as Pharmacists Manitoba).

g. Cost is \$750 for members of the Canadian Pharmacists Association.
